# Supplementary material for: SRRM2, a Potential Blood Biomarker Revealing High Alternative Splicing in Parkinson's Disease
Source: PLoS One. 2010 Feb 8;5(2):e9104. doi: 10.1371/journal.pone.0009104 (PMC2817002; doi:10.1371/journal.pone.0009104)
Supplement: Table S4 — Genes differentially regulated by at least 2.0 fold in PD blood. 58 genes were differerntially expressed (FC > = 2.0; p<.05 with no multiple correction) in the blood of 17 PDs versus 11 controls. (0.03 MB XLS) [file pone.0009104.s006.xls]

## Sheet: Sheet1
genesymbol	Fold change([PD] vs [Control])	Regulation([PD] vs [Control])	Transcripts Cluster Id	genbank
RPS24	3.73404	up	3253438	BX647260
DYNLL1	3.31801	up	3434393	U32944
GAFA3	2.9228	up	2765935	AF220235
RAP1B|hCG_1757335	2.87396	up	3421118	BC078173
RPL18	2.75571	down	3867223	L11566
HIST1H4C|HIST4H4|	2.60054	up	2899146	BC130558
TUBA1B	2.59193	up	3453732	AK094717
SEPN1	2.58894	down	2326126	BC042154
CALM2|CALM1	2.52969	up	2551924	BC047553
LOC4951|OCM	2.51643	up	3062738	BC113704
GTF2B	2.49475	up	2421753	AK289822
SLC4A1	2.47129	down	3759006	BC096107
HSPA1A|HSPA1B	2.4406	up	2902707	AK225699
ND6	2.43598	up	4037708
TMEM14B	2.39776	up	2894711	BC007080
PGK1	2.39212	down	3982462	AB062432
UBC|RPS27A	2.37911	down	3476741	AB009010
TAGLN2	2.35266	down	2439842	AY007127
KIAA0776	2.35062	up	2917914	BC036379
GABARAP	2.33726	down	3743486	BC106748
HIST1H1E	2.29195	down	2899171	BC096168
GRAP	2.29069	down	3748659	BC035856
BXDC1	2.23352	up	2921374	AL833613
RAC2	2.23189	down	3960061	BC001485
CD37	2.21452	down	3838385	AL833693
MFNG	2.18433	down	3960110	BC094814
OR10G9|OR10G4	2.18244	up	3353876
MAP2K3	2.17316	down	3714729	L36719
HNRNPA1|HNRPA1L-2|	2.17197	up	3416483	BC009600
EMILIN2	2.17047	down	3776279	AF270513
PIGY	2.15411	up	2777412	BC007876
EIF4B|LOC283335	2.14326	up	3455946	AK096472
SPAST	2.14025	up	2476075	AB029006
GRN	2.10934	down	3722917	AF055008
LOC645843	2.092	up	2701294	AY358260
HIST1H3I|HIST1H2BN	2.08545	down	2947077	BC066884
SH3BGRL3	2.08506	down	2326448	BC030135
EIF3EIP	2.08428	down	3945056	AK056129
GNB2L1|SNORD95	2.07508	down	2891052	BC010119
RPL8	2.07335	down	3159040	BC093064
DDX3Y|LOC100130220	2.07118	up	4030162	AF000984
HCP5	2.06267	down	2902326	BC106759
FAM128B|FAM128A	2.06249	down	2505386	BC066296
DND1	2.05163	down	2878461	BC033496
C14orf166	2.0515	up	3535674	DQ525179
HSPA8|LOC85389	2.05103	down	3395416	AF352832
MPDU1	2.0407	down	3708874	AF258568
FLT3LG	2.03945	down	3838556	U03858
CD79A	2.03535	down	3834502	AK223371
	2.03326	up	3057499	AY358103
ALAS2	2.03274	down	4009849	BC030230
CFL1	2.02809	down	3377886	AK097690
TCL1A	2.02692	down	3578152	BC014024
EEF2|SNORD37	2.02688	down	3846538	BC126259
KIAA0265	2.02664	up	3023795	AF277177
S100A8	2.01994	up	2435989	BC005928
S100A11	2.01786	up	2435410	D38583
IL32	2.00021	down	3645626	BC009401
Supplementary Table S4: Genes Differentially Regulated by at Least 2.0 Fold in PD Blood.
58 genes were differerntially expressed (FC >= 2.0; p<.05 with no multiple correction) in the blood of 17 PDs versus 11 controls.
